# Supplementary material
Source: ML conference proceedings conference paper supplement (https://openaccess.thecvf.com/content/CVPR_2019/html/Gur_Single_Image_Depth_CVPR_2019_paper.html)
Supplement: Supplementary file 1 [file Gur_Single_Image_Depth_CVPR_2019_supplemental.pdf]

Archive with 5 entries (4 files):
- Supplementary.pdf
- __MACOSX/
- __MACOSX/._Supplementary.pdf
- UnsupervisedDepthFromFocus.zip
- __MACOSX/._UnsupervisedDepthFromFocus.zip
