# Supplementary material
Source: ML conference proceedings conference paper supplement (https://openaccess.thecvf.com/content/CVPR_2019/html/Gur_Single_Image_Depth_CVPR_2019_paper.html)
Supplement: Supplementary file 1 [file Gur_Single_Image_Depth_CVPR_2019_supplemental.pdf › Supplementary.pdf]

## Supplementary: Differentiable Gaussian PSF Layer

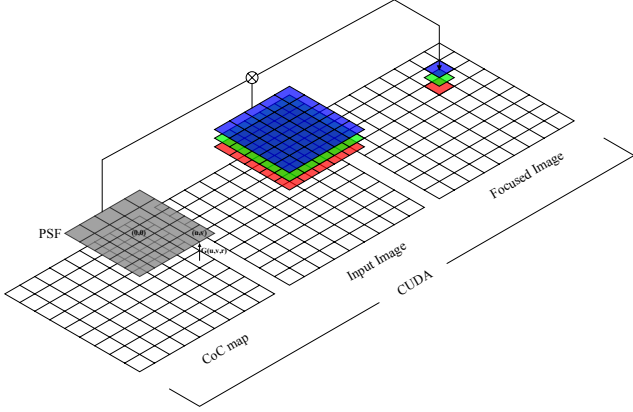

Figure 1: Illustration of the PSF convolution layer for focus rendering. each kernel is spatially computed from the CoC map and multiplied with the correspondent image patch both channel and element wise.

In this appendix we show the mathematical development of our PSF layer for backward and forward pass. For easy notation we define:

$$M_{x-i, y-j} := M[x-i, y-j]$$

where  $M$  is any matrix or function,  $(x, y)$  are location indices and  $(u, v)$  are offsets. An illustration of the the PSF convolution is shown in Fig. 1.

**Forward Pass:** For a PSF kernel of size  $m \times m$  where  $m$  is odd, we consider an offsets set  $\Omega$  of the form:

$$\Omega := \left\{ (u, v) : u, v \in \left[-\frac{m}{2}, \dots, 0, \dots, \frac{m}{2}\right] \in \mathbb{N} \right\}$$

The forward pass is calculate by the following equations, where  $I$  is the input image,  $J$  is the output image and  $C$  is the CoC map:

$$\mathcal{F}_{x,y}(u, v) = \frac{2}{\pi C_{x,y}^2} \exp \left( -2 \left( \frac{u^2 + v^2}{C_{x,y}^2} \right) \right) \quad (1)$$

$$J_{x,y} := (I \otimes F) \quad (2)$$

$$\begin{aligned} &= \frac{\int_{u,v \in \Omega} I_{x-u, y-v} \mathcal{F}_{x-u, y-v}(u, v) du dv}{\int_{u', v' \in \Omega} \mathcal{F}_{x-u', y-v'}(u', v') du' dv'} \end{aligned}$$

**Backward Pass:** We first compute derivative of loss  $\mathcal{L}$  w.r.t. image  $I$  at location  $(x, y)$ :

$$\left( \frac{\partial \mathcal{L}}{\partial I_{x,y}} \right) = \int_{\substack{u,v \in \Omega \\ s=x-u \\ t=y-v}} \left( \frac{\partial \mathcal{L}}{\partial J_{s,t}} \right) \left( \frac{\partial J_{s,t}}{\partial I_{x,y}} \right) du dv \quad (3)$$

$$\left( \frac{\partial J_{s,t}}{\partial I_{x,y}} \right) = \frac{\mathcal{F}_{x,y}(u, v)}{\int_{u', v' \in \Omega} \mathcal{F}_{s-u', t-v'}(u', v') du' dv'} \quad (4)$$

Secondly compute derivative of loss  $\mathcal{L}$  w.r.t. CoC map  $C$  at location  $(x, y)$ :

$$\left( \frac{\partial \mathcal{L}}{\partial C_{x,y}} \right) = \int_{\substack{u,v \in \Omega \\ s=x-u \\ t=y-v}} \left( \frac{\partial \mathcal{L}}{\partial J_{s,t}} \right) \left( \frac{\partial J_{s,t}}{\partial C_{x,y}} \right) du dv \quad (5)$$

$$J_{st} := \phi \cdot \psi \quad (6)$$

$$\phi := \int_{u', v' \in \Omega} I_{s-u', t-v'} \mathcal{F}_{s-u', t-v'}(u', v') du' dv' \quad (7)$$

$$\psi := \frac{1}{\int_{u', v' \in \Omega} \mathcal{F}_{s-u', t-v'}(u', v') du' dv'} \quad (8)$$

Note that we consider only  $C$  where  $(s-u', t-v') = (x, y)$ , where in these locations the offset for  $\mathcal{F}$  is the opposite of  $(u, v)$  meaning  $(-u, -v)$ , but because we only calculate their second power we can consider  $\mathcal{F}_{x,y}(u, v)$ :

$$\begin{aligned} \left( \frac{\partial \phi}{\partial C_{x,y}} \right) &= \frac{-2 \cdot 2 I_{x,y}}{\pi C_{x,y}^3} \exp \left( -2 \left( \frac{u^2 + v^2}{C_{x,y}^2} \right) \right) \\ &+ \frac{2 \cdot 2 (u^2 + v^2)}{C_{x,y}^3} \frac{2 I_{x,y}}{\pi C_{x,y}^2} \exp \left( -2 \left( \frac{u^2 + v^2}{C_{x,y}^2} \right) \right) \\ &= I_{x,y} \exp \left( -2 \left( \frac{u^2 + v^2}{C_{x,y}^2} \right) \right) \frac{2}{\pi C_{x,y}^2} \\ &\cdot \frac{4(u^2 + v^2) - 2C_{x,y}^2}{C_{x,y}^3} \end{aligned} \quad (9)$$

$$= I_{x,y} \mathcal{F}_{x,y}(u, v) \frac{4(u^2 + v^2) - 2C_{x,y}^2}{C_{x,y}^3}$$

$$\left( \frac{\partial \psi}{\partial C_{x,y}} \right) = - \left( \frac{\partial \phi}{\partial C_{x,y}} \right) \frac{\psi^2}{I_{x,y}} \quad (10)$$

Now that we have each individual derivative we can compute according to the *product rule*:

$$\left( \frac{\partial J_{s,t}}{\partial C_{x,y}} \right) = \phi \left( \frac{\partial \psi}{\partial C_{x,y}} \right) + \psi \left( \frac{\partial \phi}{\partial C_{x,y}} \right) \quad (11)$$

$$\begin{aligned} \phi \left( \frac{\partial \psi}{\partial C_{x,y}} \right) &= \frac{J_{s,t}}{\psi} \left( - \left( \frac{\partial \phi}{\partial C_{x,y}} \right) \frac{\psi^2}{I_{x,y}} \right) \\ &= - \frac{J_{s,t} \psi}{I_{x,y}} \left( \frac{\partial \phi}{\partial C_{x,y}} \right) \end{aligned} \quad (12)$$

$$\begin{aligned} \left( \frac{\partial J_{s,t}}{\partial C_{x,y}} \right) &= - \frac{J_{s,t} \psi}{I_{x,y}} \left( \frac{\partial \phi}{\partial C_{x,y}} \right) + \psi \left( \frac{\partial \phi}{\partial C_{x,y}} \right) \\ &= \frac{\psi}{I_{x,y}} \left( \frac{\partial \phi}{\partial C_{x,y}} \right) (I_{x,y} - J_{s,t}) \end{aligned} \quad (13)$$

Finally we get the complete answer:

$$\xi_{x,y}(u, v) := \frac{4(u^2 + v^2) - 2C_{x,y}^2}{C_{x,y}^3} \quad (14)$$

$$\left( \frac{\partial J_{s,t}}{\partial C_{x,y}} \right) = \frac{\psi}{I_{x,y}} I_{x,y} \mathcal{F}_{x,y}(u, v) \xi_{x,y}(u, v) (I_{x,y} - J_{s,t}) \quad (15)$$

$$= \frac{\xi_{x,y}(u, v) (I_{x,y} - J_{s,t}) \mathcal{F}_{x,y}(u, v)}{\int_{u', v' \in \Omega} \mathcal{F}_{s-u', t-v'}(u', v') du' dv'}$$
